# Supplementary material
Source: Springer Nature journal article supplement (https://www.springermedizin.de/resource/supplementary/13037_2012_136_MOESM1_ESM.pdf/9659392)

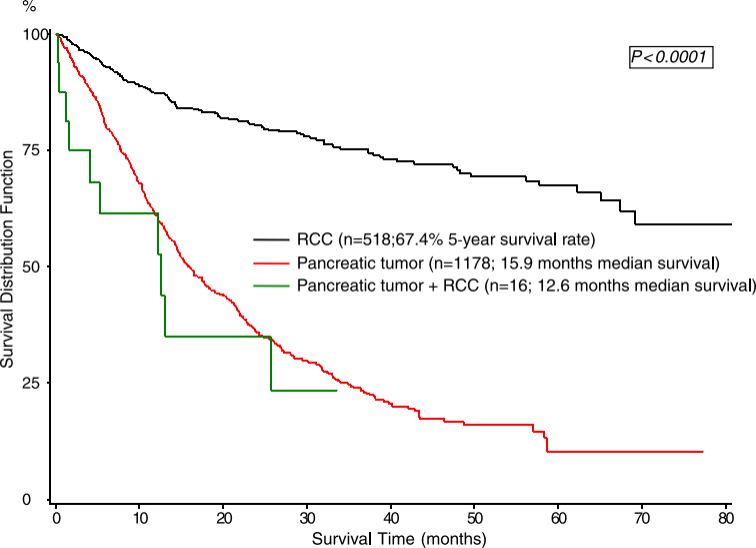

Supplement: MOESM1 [file 9659392]
